# Supplementary material
Source: Springer Nature journal article supplement (https://www.springermedizin.de/resource/supplementary/13047_2013_602_MOESM5_ESM.pdf/9664178)

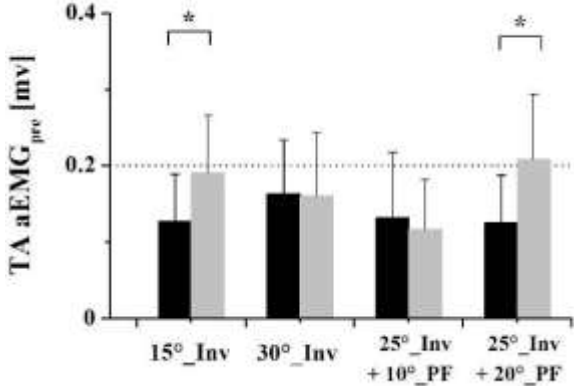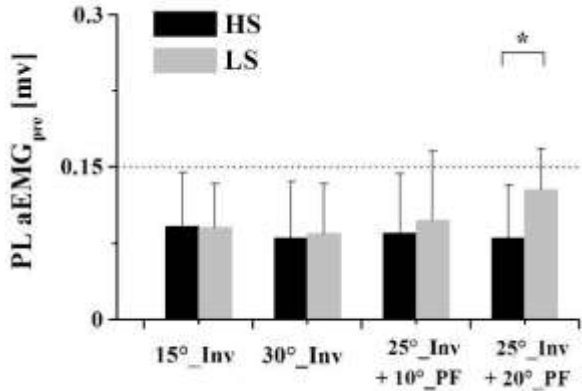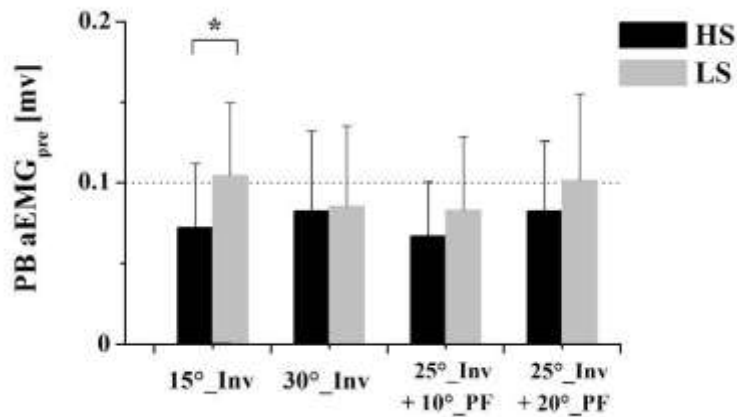

Supplement: MOESM5 [file 9664178]
